# Supplementary material for: Human spinal cord in vitro differentiation pace is initially maintained in heterologous embryonic environments
Source: eLife. 2022 Feb 21;11:e67283. doi: 10.7554/eLife.67283 (PMC8929931; doi:10.7554/eLife.67283)
Supplement: Figure 1—source data 1. [file elife-67283-fig1-data1.xlsx]

## Sheet: SOX2
	D4					D6					D10
	Positive Cells	Total cells	%			Positive Cells	Total cells	%			Positive Cells	Total cells	%
SOX2	142	206	68.932		SOX2	60	80	75		SOX2	171	208	82.211
	150	221	67.873			78	88	88.636			162	195	83.076
	193	237	81.434			67	90	74.444			190	230	82.608
	262	312	83.974			65	96	67.708			155	194	79.896
	139	185	75.135			58	95	61.052			186	202	92.079
	140	195	71.794			81	90	90			136	183	74.316
	320	478	66.945			83	101	82.178			179	200	89.5
	225	325	69.23			95	119	79.831			150	194	77.319
	195	261	74.712			74	82	90.243			185	223	82.959
	150	231	64.935			67	92	72.826			114	138	82.608
	160	210	76.19			65	95	68.421			146	171	85.38
	157	246	63.821			58	80	72.5			106	143	74.125
	281	322	87.267			62	103	60.784			92	124	74.193
	142	193	73.575			67	101	66.336			102	137	74.452
						42	78	53.846			84	113	74.336
	D4	D6	D10
mean	73.2726	73.587	80.6039				n=3 independent differentiations
sd	7.10648	11.0684	5.7752				N=15 field of view at D04 (5 per differentiation)
SEM	1.89929	2.85786	1.49115				N=15 rosettes (5 rosettes per differentiation)
							Error bars = SEM
							Statistical analysis was performed using non-parametric Mann-Whitney U test for none normally distributed data using Prism V8
												P-value D4 vs D6: >0.999
												P-value D4 vs D10: 0.0102
												P-value D6 vs D10: 0.0398

## Sheet: PAX6
	D4					D6					D10
	Positive Cells	Total cells	%			Positive Cells	Total cells	%			Positive Cells	Total cells	%
PAX6	84	226	37.168		PAX6	35	65	53.846		PAX6	48	121	39.669
	55	140	39.285			45	109	41.284			45	119	37.815
	56	144	38.888			48	93	51.612			53	102	51.96
	105	219	47.945			35	90	38.888			55	127	43.307
	30	180	16.666			29	98	29.591			47	125	37.6
	77	208	37.019			44	84	52.38			38	112	33.928
	50	190	26.315			48	93	51.612			31	115	26.956
	50	164	30.487			51	117	43.589			42	105	40
	103	204	50.49			57	120	47.5			39	110	35.454
	58	154	37.662			37	109	33.94			55	130	42.307
	64	150	42.666			55	97	56.701			65	143	45.454
	80	200	40			47	115	40.869			79	161	49.068
	64	190	33.684			45	96	46.875			73	140	52.142
	54	166	32.53			52	125	40.8			51	145	35.172
						58	106	54.716			57	151	37.748
	D4	D6	D10
mean	36.4861	45.6135	40.572
sd	8.54611	8.03212	6.97189
SEM	2.28404	2.07388	1.80013
											P-value D4 vs D6: 0.0045
											P-value D4 vs D10: 0.1754
											P-value D6 vs D10: 0.0598

## Sheet: SNAI2
	D4					D6					D10
	Positive Cells	Total cells	%			Positive Cells	Total cells	%			Positive Cells	Total cells	%
SNAI2	80	322	24.844		SNAI2	41	103	39.805		SNAI2	30	208	14.423
	40	193	20.725			36	101	35.643			26	195	13.333
	30	131	22.9			23	78	29.487			36	230	15.652
	41	206	19.902			28	107	26.168			28	194	14.432
	58	279	20.788			31	95	32.631			18	202	8.91
	62	312	18.871			28	106	26.415			37	183	20.218
	70	259	27.027			33	101	32.673			29	200	14.5
	37	245	15.102			34	123	27.642			35	194	18.041
	44	222	19.819			36	85	42.352			30	223	13.452
	45	210	21.428			37	95	35.789			33	138	23.913
	72	243	29.629			56	138	40.579			28	171	16.374
	82	282	29.078			39	92	42.391			29	143	20.279
	25	121	20.661			39	125	31.2			32	124	25.806
	62	234	26.495			28	132	21.212			36	137	26.277
						30	103	29.126			33	113	29.203
	D4	D6	D10
mean	22.6621	32.8742	18.3209
sd	4.19049	6.45015	5.79106
SEM	1.11996	1.66542	1.49525
											P-value D4 vs D6: < 0.0001
											P-value D4 vs D10: 0.0228
											P-value D6 vs D10: < 0.0001
