# Supplementary material for: Human spinal cord in vitro differentiation pace is initially maintained in heterologous embryonic environments
Source: eLife. 2022 Feb 21;11:e67283. doi: 10.7554/eLife.67283 (PMC8929931; doi:10.7554/eLife.67283)
Supplement: Figure 1—source data 2. [file elife-67283-fig1-data2.xlsx]

## Sheet: PAX7-OLIG2
	D4										D6										D10
	Positive Cells	Total cells	%			Positive Cells	Total cells	%			Positive Cells	Total cells	%			Positive Cells	Total cells	%			Positive Cells	Total cells	%			Positive Cells	Total cells	%
PAX7	98	306	32.026		OLIG2	3	306	0.98		PAX7	62	105	59.047		OLIG2	0	105	0		PAX7	190	250	76		OLIG2	8	250	3.2
	60	307	19.543			0	307	0			55	120	55			0	120	0			196	300	65.333			15	300	5
	109	295	36.949			2	295	0.677			32	88	32			0	88	0			182	248	73.387			7	248	2.822
	119	304	39.144			6	304	1.973			40	118	33.898			3	118	2.54			80	158	50.632			10	158	6.329
	80	290	27.586			4	290	1.379			45	90	50			0	90	0			92	153	60.13			9	153	5.882
	123	339	36.283			3	339	0.884			41	80	51.25			0	80	0			110	185	59.459			7	185	3.783
	206	551	37.386			10	551	1.814			60	128	46.875			2	128	1.562			120	199	60.301			10	199	5.025
	159	500	31.8			13	500	2.6			55	116	47.413			3	116	2.586			110	180	61.111			12	180	6.666
	85	291	29.209			4	291	1.374			50	90	55.555			0	90	0			126	228	55.263			13	228	5.701
	125	339	36.873			5	339	1.474			39	60	65			0	60	0			80	138	57.971			18	138	13.043
	88	310	28.387			3	310	0.967			45	80	56.25			1	80	1.25			81	125	64.8			14	125	11.2
	105	320	32.812			6	320	1.875			42	65	64.615			1	65	1.538			76	108	70.37			8	108	7.407
	155	402	38.557			30	402	7.462			60	105	57.142			0	105	0			115	142	80.985			9	142	6.338
	115	313	36.741			9	313	2.875			65	90	72.222			0	90	0			60	90	66.666			9	90	10
											42	88	47.727			0	88	0			120	175	68.571			12	175	6.857
	D4		D6		D10
	PAX7	OLIG2	PAX7	OLIG2	PAX7	OLIG2
mean	33.0926	1.881	52.9329	0.631733	64.7319	6.61687
sd	5.48839	1.77524	10.8154	0.982725	8.16167	2.86886
SEM	1.46683	0.474453	2.79253	0.253739	2.10733	0.740736
												P-value D4 PAX7 vs D6 PAX7: < 0.0001
												P-value D4 PAX7 vs D10 PAX7: < 0.0001
												P-value D6 PAX7 vs D10 PAX7: 0.0014
												P-value D6 OLIG2 vs D10 OLIG2: < 0.0001
												P-value D4 OLIG2 vs D10 OLIG2: < 0.0001
												P-value D4 OLIG2 vs D6 OLIG2: 0.0099
