# Supplementary material for: Human spinal cord in vitro differentiation pace is initially maintained in heterologous embryonic environments
Source: eLife. 2022 Feb 21;11:e67283. doi: 10.7554/eLife.67283 (PMC8929931; doi:10.7554/eLife.67283)
Supplement: Figure 1—source data 3. [file elife-67283-fig1-data3.xlsx]

## Sheet: Sheet1
		D6	D10	D14
	size (microm)	100	125	155
		100	135	160
		70	130	175
		80	135	175			n=3 independent differentiations
		100	135	185			N=18 rosettes (6 rosettes per differentiation)
		90	135	180			Error bars= SEM
		100	137	185
		90	133	165
		80	134	185
		90	130	165
		80	125	190
		90	135	175
		90	130	185
		70	130	195
		70	123	190
		70	110	195
		80	130	185
		70	125	185
		D6	D10	D14
	Average	84.4444	129.833	179.444
	Sd	11.4903	6.5192	11.7434
	SEM	2.70828	1.53659	2.76796
