# Supplementary material for: Human spinal cord in vitro differentiation pace is initially maintained in heterologous embryonic environments
Source: eLife. 2022 Feb 21;11:e67283. doi: 10.7554/eLife.67283 (PMC8929931; doi:10.7554/eLife.67283)
Supplement: Figure 2—source data 1. [file elife-67283-fig2-data1.xlsx]

## Sheet: SOX10
	D6					D10					D14
	Positive Cells	Total cells	%			Positive Cells	Total cells	%			Positive Cells	Total cells	%
SOX10	3	109	2.752		SOX10	38	141	26.95		SOX10	52	215	24.186
	3	103	2.912			72	223	32.286			34	211	16.113
	0	112	0			60	256	23.437			53	189	28.042
	0	151	0			35	183	19.125			57	249	22.891
	0	96	0			45	202	22.277			48	263	18.25
	3	122	2.459			40	215	18.604			62	213	29.107
	0	120	0			25	185	12.513			85	222	38.288
	0	139	0			15	166	9.036			55	212	25.943
	4	102	3.921			21	156	13.461			48	238	20.168
	0	114	0			75	161	46.583			37	187	19.786
	3	121	2.479			80	181	44.198			41	242	16.942
	1	126	0.793			72	152	47.368			31	182	17.032
	2	115	1.739			35	211	16.587			65	201	32.338
	0	112	0			29	192	15.104			27	197	13.705
	9	111	8.108			48	203	23.645			21	230	9.13
	D6	D10	D14		n=3 independent differentiations
mean	1.67753	24.7449	22.1281		N=15 neural rosettes (5 rosettes per differentiation)
sd	2.24882	12.5082	7.66135		Error bars = SEM
SEM	0.580642	3.22961	1.97815		Statistical analysis was performed using non-parametric Mann-Whitney U test for none normally distributed data using Prism V8
										P-value D6 vs D10: < 0.0001
										P-value D6 vs D14: < 0.0001
										P-value D10 vs D14:0.9560

## Sheet: TFAP2a
	D6					D10					D14
	Positive Cells	Total cells	%			Positive Cells	Total cells	%			Positive Cells	Total cells	%
TFAP2a	3	109	2.752		TFAP2a	36	141	25.531		TFAP2a	49	215	22.79
	3	103	2.912			58	223	26.008			27	211	12.796
	0	112	0			60	256	23.437			39	189	20.634
	0	151	0			32	183	17.486			56	249	22.489
	0	96	0			35	202	17.326			48	263	18.25
	2	122	1.639			39	215	18.139			46	213	21.596
	0	120	0			25	185	13.513			65	222	29.279
	0	139	0			12	166	7.228			45	212	21.226
	1	102	0.98			21	156	13.461			36	238	15.126
	3	114	2.631			74	161	45.962			36	187	19.251
	4	121	3.305			71	181	39.226			35	242	14.462
	0	124	0			68	152	44.736			28	182	15.384
	0	91	0			32	211	15.165			41	201	20.398
	0	82	0			29	192	15.104			30	197	15.228
	0	108	0			42	203	20.689			31	230	13.478
	D6	D10	D14
mean	0.947933	22.8674	18.8258
sd	1.31112	11.7212	4.47669
SEM	0.33853	3.02641	1.15588
											P-value D6 vs D10: < 0.0001
											P-value D6 vs D14: < 0.0001
											P-value D10 vs D14: 0.6160
