# Supplementary material for: Human spinal cord in vitro differentiation pace is initially maintained in heterologous embryonic environments
Source: eLife. 2022 Feb 21;11:e67283. doi: 10.7554/eLife.67283 (PMC8929931; doi:10.7554/eLife.67283)
Supplement: Figure 2—source data 2. [file elife-67283-fig2-data2.xlsx]

## Sheet: DCX-NFIA
	D6										D8										D10										D14										D20
	Positive Cells	Total Cells	%			Positive Cells	Total Cells	%			Positive Cells	Total Cells	%			Positive Cells	Total Cells	%			Positive Cells	Total Cells	%			Positive Cells	Total Cells	%			Positive Cells	Total Cells	%			Positive Cells	Total Cells	%			Positive Cells	Total Cells	%			Positive Cells	Total Cells	%
DCX	0	177	0		NFIA	0	177	0		DCX	7	157	4.458		NFIA	0	157	0		DCX	80	230	34.782		NFIA	0	230	0		DCX	198	364	54.395		NFIA	1	364	0.274		DCX	38	168	22.619		NFIA	45	168	26.785
	3	152	1.973			0	152	0			18	145	12.413			0	145	0			78	241	32.365			0	241	0			92	227	40.528			0	227	0			49	200	24.5			24	200	12
	1	145	0.689			0	145	0			19	110	17.272			1	110	0.909			58	145	40			0	145	0			83	201	41.293			0	201	0			71	222	31.981			22	222	9.909
	0	172	0			0	172	0			18	106	16.981			0	106	0			64	186	34.408			0	186	0			168	325	51.692			0	325	0			67	190	35.263			32	190	16.842
	3	155	1.935			0	155	0			12	139	8.633			1	139	0.719			121	330	36.666			5	330	1.515			78	181	43.093			0	181	0			47	135	34.814			10	135	7.407
	1	139	0.719			0	139	0			14	105	13.333			0	105	0			112	297	37.71			2	297	0.673			89	209	42.583			0	209	0			34	101	33.663			20	101	19.801
	0	159	0			0	159	0			15	132	11.363			1	132	0.757			48	166	28.915			2	166	1.2			63	125	50.4			0	125	0			25	94	26.595			16	93	17.204
	1	135	0.74			0	135	0			14	154	9.09			0	154	0			42	162	25.925			3	162	1.851			152	280	54.285			0	280	0			40	138	28.985			14	138	10.144
	1	145	0.689			0	145	0			21	153	13.725			0	153	0			57	180	31.666			0	180	0			85	180	47.222			0	180	0			23	120	19.166			20	120	16.666
	0	162	0			0	162	0			15	146	10.273			0	146	0			48	172	27.906			0	172	0			68	135	50.37			0	135	0			68	194	35.051			12	194	6.185
	1	175	0.571			0	175	0			12	127	9.448			0	127	0			61	165	36.969			0	165	0			95	225	42.222			0	225	0			42	126	33.333			18	126	14.285
	2	190	1.052			0	190	0			12	101	11.881			0	101	0			41	193	21.243			2	193	1.036			98	211	46.445			0	211	0			56	178	31.46			14	178	7.865
	0	162	0			0	162	0			15	137	10.948			1	137	0.729			28	137	20.437			0	137	0			78	178	43.82			0	178	0			71	230	30.869			39	230	16.956
	0	171	0			0	171	0			12	146	8.219			0	146	0			49	172	28.488			0	172	0			125	233	53.648			0	233	0			55	152	36.184			17	152	11.184
	0	155	0			0	155	0			15	141	10.638			0	141	0			69	201	34.328			1	201	0.497			112	215	52.093			0	215	0			56	180	31.111			7	180	3.888
	D6		D8		D10		D14		D20
	DCX	NFIA	DCX	NFIA	DCX	NFIA	DCX	NFIA	DCX	NFIA
mean	0.557867	0	11.245	0.2076	31.4539	0.451467	47.6059	0.0182667	30.3729	13.1414
sd	0.67694	0	3.30407	0.358695	5.87202	0.647927	5.06984	0.0707465	5.06982	6.02546
SEM	0.174785	0	0.853108	0.0926146	1.51615	0.167294	1.30903	0.0182667	1.30902	1.55577
													P-value D6 DCX vs D8 DCX: < 0.0001
													P-value D6 DCX vs D10 DCX: < 0.0001
													P-value D6 DCX vs D14 DCX: < 0.0001
													P-value D6 DCX vs D20 DCX: < 0.0001
													P-value D10 DCX vs D14 DCX: < 0.0001
													P-value D14 DCX vs D20 DCX: < 0.0001
													P-value D14 NFIA vs D20 NFIA: < 0.0001
