# Supplementary material for: Human spinal cord in vitro differentiation pace is initially maintained in heterologous embryonic environments
Source: eLife. 2022 Feb 21;11:e67283. doi: 10.7554/eLife.67283 (PMC8929931; doi:10.7554/eLife.67283)
Supplement: Figure 2—source data 3. [file elife-67283-fig2-data3.xlsx]

## Sheet: P27
	D6					D8					D10					D14
	Positive Cells	Total Cells	%			Positive Cells	Total Cells	%			Positive Cells	Total Cells	%			Positive Cells	Total Cells	%
P27	0	93	0		P27	10	121	8.264		P27	26	116	22.413		P27	60	175	34.285
	0	89	0			10	104	9.615			18	107	16.822			57	162	35.185
	0	109	0			8	94	8.51			28	101	27.722			49	139	35.251
	0	118	0			11	94	11.702			29	115	25.217			39	149	26.174
	0	96	0			9	96	9.375			24	104	23.076			45	145	31.034
	0	88	0			12	108	11.111			33	119	27.731			56	136	41.176
	0	83	0			15	123	12.195			51	120	42.5			43	146	29.452
	0	84	0			11	104	10.576			49	109	44.954			54	150	36
	2	114	1.754			7	114	6.14			26	95	27.368			44	144	30.555
	0	95	0			6	95	6.315			22	78	28.205			64	148	43.243
	2	105	1.904			12	115	10.434			26	114	22.807			65	157	41.401
	0	103	0			10	103	9.708			27	103	26.213			61	167	36.526
	1	92	1.086			13	112	11.607			31	116	29.31			65	136	47.794
	0	86	0			10	96	10.416			26	105	24.761			69	157	43.949
	0	98	0			11	98	11.224			28	118	23.728			81	172	47.093
	D6	D8	D10	D14
mean	0.316267	9.8128	27.5218	37.2745
sd	0.675106	1.84263	7.28805	6.58773
SEM	0.174312	0.475765	1.88177	1.70094
										P-value D6 vs D8: < 0.0001
										P-value D6 vs D10: < 0.0001
										P-value D6 vs D14: < 0.0001
										P-value D8 vs D10: < 0.0001
										P-value D8 vs D14: < 0.0001
										P-value D10 vs D14: 0.0003
