# Supplementary material for: Human spinal cord in vitro differentiation pace is initially maintained in heterologous embryonic environments
Source: eLife. 2022 Feb 21;11:e67283. doi: 10.7554/eLife.67283 (PMC8929931; doi:10.7554/eLife.67283)
Supplement: Figure 2—source data 4. [file elife-67283-fig2-data4.xlsx]

## Sheet: LHX2
	D6					D08					D10					D14
	Positive Cells	Total cells	%			Positive Cells	Total cells	%			Positive Cells	Total cells	%			Positive Cells	Total cells	%
LHX2	1	120	0.833		Lhx2	2	135	1.481		LHX2	43	212	20.283		LHX2	41	177	23.163
	0	132	0			5	118	4.237			19	160	11.875			38	168	22.619
	0	109	0			5	120	4.166			21	166	12.65			49	175	28
	0	106	0			6	145	4.137			9	106	8.49			51	215	23.72
	0	118	0			2	123	1.626			6	111	5.405			36	205	17.561
	0	96	0			3	125	2.4			12	101	11.881			55	225	24.444
	0	111	0			6	150	4			15	127	11.811			69	227	30.396
	0	104	0			3	140	2.142			9	107	8.411			65	216	30.092
	0	95	0			1	135	0.74			21	136	15.441			60	265	22.641
	0	118	0			3	140	2.14			15	105	14.285			40	202	19.801
	0	110	0			5	126	3.968			18	103	17.475			27	210	12.857
	0	95	0			6	148	4.054			17	115	14.782			40	230	17.391
	0	93	0			3	125	2.4			9	75	12			35	250	14
	0	85	0			1	120	0.833			9	90	10			49	275	17.818
	0	101	0			3	118	2.542			11	85	12.941			48	267	17.977
	D6	D8	D10	D14
mean	0.0555333	2.7244	12.5153	21.4987
sd	0.21508	1.2676	3.71743	5.38737
SEM	0.0555333	0.265974	0.959836	1.39101
											P-value D6 vs D8: < 0.0001
											P-value D6 vs 10: < 0.0001
											P-value D6 vs D14: < 0.0001
											P-value D8 vs 10: < 0.0001
											P-value D8 vs 14: < 0.0001
											P-value D10 vs 14: < 0.0001
