# Supplementary material for: Human spinal cord in vitro differentiation pace is initially maintained in heterologous embryonic environments
Source: eLife. 2022 Feb 21;11:e67283. doi: 10.7554/eLife.67283 (PMC8929931; doi:10.7554/eLife.67283)
Supplement: Figure 2—source data 5. [file elife-67283-fig2-data5.xlsx]

## Sheet: ISLET1-HB9
	D6										D10										D14
	Positive Cells	Total cells	%			Positive Cells	Total cells	%			Positive Cells	Total cells	%			Positive Cells	Total cells	%			Positive Cells	Total cells	%			Positive Cells	Total cells	%
ISLET1	1	90	1.111		HB9	0	90	0		ISLET1	15	144	10.416		HB9	0	144	0		ISLET1	30	246	12.195		HB9	0	246	0
	0	116	0			0	116	0			7	140	5			0	140	0			38	190	20			0	190	0
	2	87	2.298			0	87	0			15	132	11.363			0	132	0			29	150	19.333			0	150	0
	0	100	0			0	100	0			27	240	11.25			0	240	0			35	171	20.467			0	171	0
	0	111	0			0	111	0			15	190	7.894			0	190	0			38	175	21.714			0	175	0
	0	100	0			0	100	0			18	198	9.09			0	198	0			46	148	31.081			0	148	0
	0	94	0			0	94	0			10	190	5.263			0	190	0			49	204	24.019			0	204	0
	0	102	0			0	102	0			16	174	9.195			0	174	0			46	214	21.495			0	214	0
	0	119	0			0	119	0			21	180	11.666			0	180	0			57	172	33.139			0	172	0
	0	101	0			0	101	0			7	134	5.223			0	134	0			39	200	19.5			0	200	0
	0	105	0			0	105	0			22	186	11.827			0	211	0			41	210	19.523			0	210	0
	0	96	0			0	96	0			15	211	7.109			0	186	0			37	170	21.764			0	170	0
	0	117	0			0	117	0			13	157	8.28			0	157	0			31	221	14.027			0	221	0
	0	122	0			0	122	0			11	156	7.051			0	156	0			31	191	16.231			0	191	0
	0	109	0			0	109	0			1	204	0.491			0	204	0			41	205	20			0	205	0
	D6		D10		D14
	ISLET1	HB9	ISLET1	HB9	ISLET1	HB9
mean	0.227267	0	8.07453	0	20.9659	0
sd	0.640333	0	3.17017	0	5.4629	0
SEM	0.165333	0	0.818534	0	1.41051	0
												P-value D6 ISLET1 vs D10 ISLET1: < 0.0001
												P-value D6 ISLET1 vs D14 ISLET1: < 0.0001
												P-value D10 ISLET1 vs D10 ISLET1: < 0.0001
