# Supplementary material for: Human spinal cord in vitro differentiation pace is initially maintained in heterologous embryonic environments
Source: eLife. 2022 Feb 21;11:e67283. doi: 10.7554/eLife.67283 (PMC8929931; doi:10.7554/eLife.67283)
Supplement: Figure 2—source data 6. [file elife-67283-fig2-data6.xlsx]

## Sheet: BRN3A
	D6					D10					D14
	Positive Cells	Total cells	%			Positive Cells	Total cells	%			Positive Cells	Total cells	%
BRN3A	0	90	0		BRN3A	0	134	0		BRN3A	17	221	7.692
	0	116	0			5	186	2.688			12	191	6.282
	0	87	0			3	211	1.421			26	205	12.682
	0	100	0			0	157	0			32	196	16.326
	0	111	0			0	156	0			28	213	13.145
	0	100	0			2	204	0.98			18	168	10.714
	0	94	0			0	163	0			26	170	15.294
	0	102	0			0	185	0			23	157	14.649
	0	119	0			0	108	0			26	134	19.402
	0	101	0			0	115	0			14	128	10.937
	0	105	0			0	120	0			31	145	21.379
	0	96	0			0	167	0			17	125	13.6
	0	117	0			0	181	0			23	151	15.231
	0	122	0			1	156	0.641			13	120	10.833
	0	109	0			0	161	0			21	128	16.406
	D6	D10	D14
mean	0	0.382	13.6381
sd	0	0.775841	4.04151
SEM	0	0.200321	1.04351
											P-value D6 vs D10: 0.0996
											P-value D6 vs D14: < 0.0001
											P-value D10 vs D14: < 0.0001
