# Supplementary material for: Human spinal cord in vitro differentiation pace is initially maintained in heterologous embryonic environments
Source: eLife. 2022 Feb 21;11:e67283. doi: 10.7554/eLife.67283 (PMC8929931; doi:10.7554/eLife.67283)
Supplement: Figure 4—figure supplement 1—source data 1. [file elife-67283-fig4-figsupp1-data1.xlsx]

## Sheet: In vitro D6 ChiPS4-pmGFP
ChiPS4-pmGFP
		SOX2				PAX7				SNAI2				P27				ISLET1				TFAP2a
	SOX2+	Total	%		PAX7+	Total	%		SNAI2+	Total	%		P27+	Total	%		ISLET1	Total	%		TFAP2a	Total	%
	167	212	78.777		103	164	62.805		40	120	33.333		0	204	0		0	97	0		0	105	0
	176	226	77.876		99	155	63.87		28	80	35		0	201	0		0	120	0		0	115	0
	175	221	79.185		101	162	62.345		37	125	29.6		0	200	0		0	134	0		0	97	0
	187	219	85.388		186	286	65.034		50	155	32.258		0	125	0		0	151	0		0	120	0
	174	206	84.466		191	282	67.73		37	120	30.833		0	120	0		0	120	0		0	85	0
	176	209	84.21		176	276	63.768		65	151	43.046		0	119	0		0	101	0		0	105	0
	261	301	86.711		48	87	55.172		55	181	30.386		0	38	0		0	165	0		0	103	0
	220	284	77.464		53	86	61.627		25	104	24.038		0	40	0		0	145	0		0	135	0
	238	287	82.926		40	79	50.632		31	129	24.031		0	38	0		0	110	0		0	107	0
	141	161	87.577		88	140	62.857		53	184	28.804		0	99	0		0	94	0		0	145	0
	143	178	80.337		63	131	48.091		75	284	26.408		0	91	0		0	100	0		0	120	0
	147	171	85.965		81	130	62.307		20	100	20		0	73	0		0	103	0		0	110	0
	88	96	91.666		69	124	55.645		17	65	26.153		0	132	0		0	95	0		0	90	0
	81	100	81		74	128	57.812		28	168	16.666		0	140	0		0	102	0		0	101	0
	84	113	74.336		123	219	56.164		25	121	20.661		0	127	0		0	85	0		0	111	0
	mean		82.5256		mean		59.7239		mean		28.0811		mean		0		mean		0		mean		0
	sd		4.62913		sd		5.56767		sd		6.66814		sd		0		sd		0		sd		0
	SEM		1.19524		SEM		1.43757		Sem		1.72171		SEM		0		SEM		0		SEM		0
						n=3 independent differentiations
						N=15 neural rosettes (5 per differentiation)
						Error bars= SEM
						Statistical analysis was performed using non-parametric Mann-Whitney U test for none normally distributed data using Prism V8
				SOX2	PAX7	SNAI2	P27	ISLET1	TFAP2a
			mean	82.5256	59.7239	28.0811	0	0	0
			sd	4.62913	5.56767	6.66814	0	0	0
			SEM	1.19524	1.43757	1.72171	0	0	0
		Stats:	SOX2		PAX7		SNAI2		P27		ISLET1		TFAP2α
		P-value	D6 vs D8: 0.0998		D6 vs D8: 0.9560		D6 vs D8: 0.3415		D6 vs D8: < 0.0001		D6 vs D8: > 0.999		D6 vs D8: < 0.0001
			D6 vs D11:0.5328		D6 vs D11: < 0.0001		D6 vs D10: < 0.0001		D6 vs D11: < 0.0001		D6 vs D11: < 0.0001		D6 vs D11: < 0.0001
			D8 vs D11: 0.4076		D8 vs D11: 0.0059		D8 vs D11: < 0.0001		D8 vs D11: < 0.0001		D8 vs D11: < 0.0001		D8 vs D11: 0.7518
