# Supplementary material for: Human spinal cord in vitro differentiation pace is initially maintained in heterologous embryonic environments
Source: eLife. 2022 Feb 21;11:e67283. doi: 10.7554/eLife.67283 (PMC8929931; doi:10.7554/eLife.67283)
Supplement: Figure 4—figure supplement 1—source data 2. [file elife-67283-fig4-figsupp1-data2.xlsx]

## Sheet: In vitro D8-2DPO ChiPS4-pmGFP
ChiPS4-pmGFP
		SOX2				PAX7				SNAI2				P27				ISLET1				TFAP2a
	SOX2+	Total	%		PAX7+	Total	%		SNAI2+	Total	%		P27+	Total	%		ISLET1	Total	%		TFAP2	Total	%
	90	99	90.9		60	103	58.252		20	102	19.607		10	121	8.264		0	162	0		14	90	15.555
	88	102	86.27		55	120	45.833		24	97	24.742		10	104	9.615		0	175	0		16	108	14.814
	98	115	85.217		42	98	42.857		19	101	18.811		8	94	8.51		0	166	0		17	68	25
	118	130	90.769		65	128	50.781		23	99	23.232		11	94	11.702		0	59	0		16	88	18.181
	58	95	61.052		66	100	66		19	60	31.666		9	96	9.375		0	60	0		10	91	10.989
	87	99	87.878		52	90	57.777		20	81	24.691		12	108	11.111		0	59	0		16	90	17.777
	83	101	82.178		71	138	51.449		20	96	20.833		15	123	12.195		0	89	0		13	96	13.541
	101	119	84.873		67	116	57.758		10	74	13.513		11	104	10.576		0	98	0		8	51	15.686
	120	129	93.023		60	100	60		21	75	28		7	114	6.14		0	88	0		12	77	15.584
	115	122	94.262		69	90	76.666		25	106	23.584		6	95	6.315		0	125	0		10	76	13.157
	80	95	84.21		65	100	65		75	301	33.222		12	115	10.434		0	120	0		26	100	26
	99	110	90		72	95	75.789		78	287	27.177		10	103	9.708		0	119	0		25	106	23.584
	82	103	79.611		70	115	60.869		27	100	27		13	112	11.607		0	132	0		18	107	16.822
	78	101	77.227		76	100	76		22	70	31.428		10	96	10.416		0	140	0		12	88	13.636
	115	132	87.121		73	118	61.864		63	184	34.239		11	98	11.224		0	127	0		24	108	22.222
	mean		84.9727		mean		60.4597		mean		25.4497		mean		9.8128		mean		0		mean		17.5032
	sd		8.14707		sd		10.3883		sd		5.82738		sd		1.84263		sd		0		sd		4.61852
	SEM		2.10356		SEM		2.68224		SEM		1.50462		SEM		0.475765		SEM		0		SEM		1.1925
			SOX2	PAX7	SNAI2	P27	ISLET1	TFAP2a
		mean	84.9727	60.4597	25.4497	9.8128	0	17.5032
		sd	8.14707	10.3883	5.82738	1.84263	0	4.61852
		SEM	2.10356	2.68224	1.50462	0.475765	0	1.1925
