# Supplementary material for: Human spinal cord in vitro differentiation pace is initially maintained in heterologous embryonic environments
Source: eLife. 2022 Feb 21;11:e67283. doi: 10.7554/eLife.67283 (PMC8929931; doi:10.7554/eLife.67283)
Supplement: Figure 4—figure supplement 1—source data 3. [file elife-67283-fig4-figsupp1-data3.xlsx]

## Sheet: In vitro D11-5DPO ChiPS4-pmGFP
ChiPS4-pmGFP
		SOX2				PAX7				SNAI2				P27				ISLET1				TFAP2a
	SOX2+	Total	%		PAX7+	Total	%		SNAI2+	Total	%		P27+	Total	%		ISLET1+	Total	%		TFAP2+	Total	%
	147	174	84.482		122	151	80.794		31	146	21.232		30	145	20.689		5	65	7.692		15	88	17.045
	115	150	76.666		200	270	74.074		20	125	16		25	146	17.123		7	80	8.75		21	114	18.421
	147	169	86.982		157	201	78.109		20	120	16.666		30	245	12.244		5	68	7.352		13	101	12.871
	213	233	91.416		120	168	71.428		15	87	17.241		23	170	13.529		15	100	15		20	118	16.949
	105	155	67.741		104	160	65		11	101	10.891		22	125	17.6		9	81	11.111		18	80	22.5
	140	171	81.871		170	220	77.272		31	146	21.232		29	170	17.058		3	55	5.455		18	100	18
	141	151	93.377		134	180	74.444		30	145	20.689		26	150	17.333		7	55	12.727		14	90	15.555
	89	111	80.18		126	181	69.613		24	135	17.777		28	149	18.791		4	50	8		18	85	21.176
	198	215	92.093		125	171	73.099		19	101	18.811		24	140	17.142		10	100	10		10	86	11.627
	131	164	79.878		146	200	73		21	100	21		24	153	15.686		23	153	15.032		17	107	15.887
	171	208	82.211		174	250	69.6		18	120	15		35	145	24.137		25	155	16.129		20	100	20
	172	205	83.902		203	300	67.666		16	163	9.815		29	138	21.014		13	156	8.333		15	90	16.666
	190	230	82.608		181	248	72.983		25	135	18.518		33	121	27.272		15	132	11.363		16	101	15.841
	165	204	80.882		101	158	63.924		26	146	17.808		51	145	35.172		7	134	5.223		17	110	15.454
	196	212	92.452		126	228	55.263		25	138	18.115		31	126	24.603		7	140	5		19	90	21.111
	mean		83.7827		mean		71.0846		mean		17.3863		mean		19.9595		mean		9.81113		mean		17.2735
	sd		6.85254		sd		6.37094		sd		3.43706		sd		5.87323		sd		3.6551		sd		3.03056
	SEM		1.76932		SEM		1.64497		SEM		0.887445		SEM		1.51646		SEM		0.943742		SEM		0.782488
				SOX2	PAX7	SNAI2	P27	ISLET1	TFAP2a
			mean	83.7827	71.0846	17.3863	19.9595	9.81113	17.2735
			sd	6.85254	6.37094	3.43706	5.87323	3.6551	3.03056
			SEM	1.76932	1.64497	0.887445	1.51646	0.943742	0.782488
