# Supplementary material for: Human spinal cord in vitro differentiation pace is initially maintained in heterologous embryonic environments
Source: eLife. 2022 Feb 21;11:e67283. doi: 10.7554/eLife.67283 (PMC8929931; doi:10.7554/eLife.67283)
Supplement: Figure 4—figure supplement 4—source data 1. [file elife-67283-fig4-figsupp4-data1.xlsx]

## Sheet: Small Cell Group 2DPO PAX7
			PAX7
		PAX7+	Total GFP+	%
	Incorporated Small Cell Group	50	50	100
		80	80	100	mean	100
		30	30	100	sd	0
		15	15	100
		20	20	100
		23	23	100
	Incorporated Single Cells	4	4	100
		23	25	92
		2	2	100	mean	98.6667
		10	10	100	sd	3.26599					ISCG: Incorporated Small Cell Group
		2	2	100							ISC: Incorporated Single Cells
		1	1	100
	n=3 different transplanted chicken embryos
	3 different sections per markers
	Error bars= SD
	Statistical analysis was performed using non-parametric Mann-Whitney U test for none normally distributed data using Prism V8

## Sheet: Small Cell Group 2DPO P27
			P27
		P27+	Total GFP+	%
	Incorporated Small Cell Group	0	17	0
		0	50	0	mean	0
		0	18	0	sd	0
		0	74	0
		0	21	0
		0	30	0
		0	10	0
		0	13	0
	Incorporated Single Cells	0	7	0							ISCG: Incorporated Small Cell Group
		0	15	0							ISC: Incorporated Single Cells
		1	30	3.33	mean	2.62125
		3	17	17.64	sd	6.17935
		0	4	0
		0	3	0
		0	1	0
		0	1	0

## Sheet: Small Cell Group 2DPO ISLET1
			ISLET1
		ISLET1+	Total GFP+	%
	Incorporated Small Cell Group	0	21	0
		0	21	0	mean	0
		0	78	0	sd	0
		0	22	0
		0	7	0
		0	39	0
		0	10	0
		0	25	0
	Incorporated Single Cells	0	2	0							ISCG: Incorporated Small Cell Group
		0	5	0							ISC: Incorporated Single Cells
		0	15	0	mean	0
		0	2	0	sd	0
		0	1	0
		0	2	0
		0	2	0
		0	5	0
