# Supplementary material for: Human spinal cord in vitro differentiation pace is initially maintained in heterologous embryonic environments
Source: eLife. 2022 Feb 21;11:e67283. doi: 10.7554/eLife.67283 (PMC8929931; doi:10.7554/eLife.67283)
Supplement: Figure 4—figure supplement 4—source data 2. [file elife-67283-fig4-figsupp4-data2.xlsx]

## Sheet: Small Cell Group 5DPO PAX7
			PAX7
		PAX7+	Total GFP+	%
	Incorporated Small Cell Group	20	30	66.66
		17	24	70.83	mean	80.7
		95	105	90.47	sd	11.4319
		100	104	96.15
		17	20	85
		51	71	71.83
		50	81	61.72
		39	50	78
		100	112	89.28							ISCG: Incorporated Small Cell Group
		61	70	87.14							ISC: Incorporated Single Cells
		29	32	90.62
	Incorporated Single Cells	4	5	80
		13	17	76.47
		8	9	88.88	mean	76.676
		7	10	70	sd	6.61216
		15	18	83.33
		6	8	75
		4	5	80
		5	7	71.42
		2	3	66.66
		3	4	75
	n=3 different transplanted chicken embryos
	3 different sections per markers
	Error bars= SD
	Statistical analysis was performed using non-parametric Mann-Whitney U test for none normally distributed data using Prism V8

## Sheet: Small Cell Group 5DPO P27
			P27
		P27+	Total GFP+	%
	Incorporated Small Cell Group	3	53	5.66
		3	140	2.14	mean	6.77667
		10	90	11.11	sd	3.22322
		5	40	12.5
		5	90	5.55
		3	45	6.66
		2	41	4.87
		1	20	5
		3	40	7.5							ISCG: Incorporated Small Cell Group
	Incorporated Single Cells	0	7	0							ISC: Incorporated Single Cells
		3	32	9.37
		0	5	0	mean	2.43
		0	4	0	sd	4.88496
		0	5	0
		0	5	0
		0	3	0
		1	8	12.5
		0	5	0

## Sheet: Small Cell Group 5DPO ISLET1
			ISLET1
		ISLET1+	Total GFP+	%
	Incorporated Small Cell Group	5	105	4.76
		0	90	0	mean	5.365
		0	7	0	sd	5.2648
		3	100	3
		5	115	4.34
		0	10	0
		5	90	5.55
		8	80	10
		4	25	16							ISCG: Incorporated Small Cell Group
		1	10	10							ISC: Incorporated Single Cells
	Incorporated Single Cells	1	16	6.25
		0	8	0
		0	4	0	mean	2.625
		0	2	0	sd	6.41315
		0	4	0
		0	5	0
		0	6	0
		1	5	20
		0	3	0
		0	4	0
