# Supplementary material for: Human spinal cord in vitro differentiation pace is initially maintained in heterologous embryonic environments
Source: eLife. 2022 Feb 21;11:e67283. doi: 10.7554/eLife.67283 (PMC8929931; doi:10.7554/eLife.67283)
Supplement: Figure 4—source data 1. [file elife-67283-fig4-data1.xlsx]

## Sheet: 2DPO SOX2
		SOX2
	SOX2+	Total GFP+	%
Incorporated Cell Group	22	22	100					Incorporated Cell Goup	Incorporated Single cells	Contiguous Rosette
	28	28	100				mean	93.6715	47.4997	96.2722
	18	20	90	mean	93.6715		sd	6.21739	31.1582	4.15255
	16	19	84.21	sd	6.21739
	25	26	96.153
	22	24	91.666
Incorporated Single Cells	2	3	66.666
	2	3	66.666
	0	5	0	mean	47.4997
	1	6	16.666	sd	31.1582
	3	4	75
	3	5	60
Contiguous Rosette	5	5	100
	3	3	100
	16	16	100	mean	96.2722
	13	14	92.857	sd	4.15255
	156	171	91.228
	145	155	93.548
															ICG: Incorporated Cell Group
															ISC: incorporated Single cells
				n=3 different transplanted chicken embryos											CR: Contiguous Rosette
				3 different sections per markers
				Error bars= SD
				Statistical analysis was performed using non-parametric Mann-Whitney U test for none normally distributed data using Prism V8

## Sheet: 2DPO PAX7
		PAX7
	PAX7+	Total GFP+	%
Incorporated Cell Group	38	40	95					Incorporated Cell Group	incorporated Single Cells	Contiguous Rosette
	34	35	97.142				mean	92.982	58.5712	96.8634
	10	10	100	mean	92.982		sd	6.93854	37.2525	3.8902
	8	10	80	sd	6.93854
	23	25	92
	30	32	93.75
Incorporated Single Cells	5	7	71.428
	3	3	100
	0	1	0	mean	58.5712
	5	7	71.428	sd	37.2525
	1	2	50
Contiguous Rosette	110	120	91.666
	90	91	98.901
	37	37	100	mean	96.8634
	30	32	93.75	sd	3.8902
	1	1	100
														ICG: Incorporated Cell Group
														ISC: incorporated Single cells
														CR: Contiguous Rosette

## Sheet: 2DPO P27
		P27
	P27+	Total GFP+	%					Incorporated Cell Group	Incorporated Single Cells	Contiguous Rosette
Incorporated Cell Group	3	15	20				mean	13.0895	38.3332	15.9598
	7	40	17.5				sd	5.30865	22.0855	11.0192
	3	35	8.571	mean	13.0895
	10	80	12.5	sd	5.30865
	1	17	5.882
	10	71	14.084
Incorporated Single Cells	2	4	50
	2	5	40
	2	3	66.666	mean	38.3332
	2	5	40	sd	22.0855
	1	3	33.333
	0	4	0
Contiguous Rosette	5	20	25
	10	60	16.666
	7	120	5.833	mean	15.9598
	13	46	28.26	sd	11.0192
	4	20	20
	0	10	0
														ICG: Incorporated Cell Group
														ISC: Incorporated Single Cells
														CR: Contiguous Rosette

## Sheet: 2DPO ISLET1
		ISLET1
	ISLET1+	Total GFP+	%
Incorporated Cell Group	0	10	0
	0	19	0
	0	24	0	mean	0
	0	31	0	sd	0
	0	19	0
Incorporated Single Cells	0	6	0
	0	1	0
	0	1	0	mean	0
	0	1	0	sd	0
	0	6	0
Contiguous Rosette	0	45	0
	0	205	0
	0	10	0	mean	0
	0	21	0	sd	0
	0	40	0
