# Supplementary material for: Human spinal cord in vitro differentiation pace is initially maintained in heterologous embryonic environments
Source: eLife. 2022 Feb 21;11:e67283. doi: 10.7554/eLife.67283 (PMC8929931; doi:10.7554/eLife.67283)
Supplement: Figure 5—source data 1. [file elife-67283-fig5-data1.xlsx]

## Sheet: 2DPO SNAI2
		SNAI2
	SNAI2+	Total GFP+	%					Incorporated Cell Group	Incorporated Single Cells	Contiguous Rosette
Incorporated Cell Group	11	61	18.032				mean	12.5512	51.6665	15.5712
	2	10	20				sd	5.46205	33.5824	6.31782
	2	19	10.526	mean	12.5512
	1	8	12.5	sd	5.46205
	1	13	7.692
	4	61	6.557
Incorporated Single Cells	3	5	60
	1	3	33.333
	1	2	50	mean	51.6665
	0	2	0	sd	33.5824
	2	2	100
	2	3	66.666
Contiguous Rosette	8	47	17.021
	3	37	8.108
	5	22	22.727	mean	15.5712
	1	10	10	sd	6.31782
	1	5	20
														ICG: Incorporated Cell Group
														ISC: incorporated Single Cells
														Cr: Contiguous Rosette
			n=3 different transplanted chicken embryos
			3 different sections per markers
			Error bars= SD
			Statistical analysis was performed using non-parametric Mann-Whitney U test for none normally distributed data using Prism V8

## Sheet: 2DPO HNK1
		HNK1
	HNK1+	Total GFP+	%					Incorporated cell Group	Incorporated Single Cells	contiguous Rosette
Incorporated Cell Group	8	101	7.92				mean	6.0592	51.349	19.099
	4	82	4.878				sd	1.24223	29.477	2.94824
	3	58	5.172	mean	6.0592
	2	30	6.666	sd	1.24223
	3	53	5.66
Incorporated Single Cells	5	9	55.555
	1	4	25
	3	7	42.857	mean	51.349
	2	2	100	sd	29.477
	1	3	33.333
Contiguous Rosette	7	30	23.333
	6	34	17.647	mean	19.099
	3	16	18.75	sd	2.94824
	3	18	16.666
													ICG: Incorporated cell Group
													ISC: incorporated Single Cells
													CR: Contiguous Rosette

## Sheet: 2DPO TFAP2a
		TFAP2a
	TFAP2a+	Total GFP+	%					Incorporated Cell Group	Incorporated Single Cells	Contiguous Rosette
incorporated Cell Group	2	13	15.384				mean	11.5003	41.9443	13.5995
	11	64	17.187				sd	5.06104	28.3316	6.39739
	6	50	12	mean	11.5003
	10	82	12.195	sd	5.06104
	3	107	2.803
	5	53	9.433
Incorporated Single cells	4	6	66.666
	4	10	40
	0	4	0	mean	41.9443
	3	4	75	sd	28.3316
	2	4	50
	1	5	20
Contiguous Rosette	8	109	7.339
	10	113	8.849
	4	49	8.163	mean	13.5995
	10	49	20.408	sd	6.39739
	8	37	21.621
	7	46	15.217
													ICG: Incorporated cells
													ISC: Incorporated Single Cells
													CR: Contiguous Rosette
