# Supplementary material for: Human spinal cord in vitro differentiation pace is initially maintained in heterologous embryonic environments
Source: eLife. 2022 Feb 21;11:e67283. doi: 10.7554/eLife.67283 (PMC8929931; doi:10.7554/eLife.67283)
Supplement: Figure 6—source data 1. [file elife-67283-fig6-data1.xlsx]

## Sheet: 5DPO SOX2
		SOX2
	SOX2+ cells	Total GFP+	%
Incorporated Cell Group	107	107	100
	28	28	100		Incorporated Cell Group	Incorporated Single Cells
	139	139	100	mean	95.8652	54.8002
	97	103	94.174	sd	5.01803	38.3813
	90	103	87.378
	87	87	100
	98	111	88.288
	56	58	96.551
	107	111	96.396
Incorporated Single Cells	4	5	80
	0	0	0
	26	30	86.666
	20	26	76.923
	28	34	82.352
	0	0	0
	1	8	12.5
	5	7	71.428											ICG: Incorporated Cell Group
	30	36	83.333											ISC: Incorporated Single Cells
		n=3 different transplanted chicken embryos
		3 different sections per markers
		Error bars= SD
		Statistical analysis was performed using non-parametric Mann-Whitney U test for none normally distributed data using Prism V8

## Sheet: 5DPO PAX7
		PAX7
	PAX7+ cells	Total GFP+	%
Incorporated Cell Group	88	96	91.666
	184	194	94.845		Incorporated Cell Group	Incorporated Single Cells
	92	98	93.877	mean	77.2523	63.8446
	10	10	100	sd	26.9086	40.9391
	170	238	71.428
	119	234	50.854
	12	66	18.181
	181	195	92.82
	102	125	81.6
Incorporated Single Cells	8	8	100
	6	6	100
	0	0	0
	0	6	0
	36	47	76.595
	4	20	20
	3	3	100
	23	27	85.185
	5	6	83.333
	11	15	73.333
											ICG: Incorporated Cell Group
											ISC: Incorporated Single Cells

## Sheet: 5DPO P27
		P27
	P27+ cells	Total GFP+	%
Incorporated Cell Group	13	174	7.471
	14	240	5.833		Incorporated Cell Group	Incorporated Single Cells
	3	55	5.454	mean	6.64644	3.33156
	16	175	9.142	sd	1.59168	3.18638
	17	184	9.239
	2	40	5
	9	146	6.164
	8	136	5.882
	4	71	5.633
Incorporated Single Cells	0	6	0
	0	9	0
	1	18	5.555
	1	16	6.25
	1	16	6.25
	0	3	0
	1	19	5.263
	1	15	6.666
	0	4	0
											ICG: Incorporated Cell Group
											ISC: Incorporated Single Cells

## Sheet: 5DPO ILSET1
		ISLET1
	ISLET1+ cells	Total GFP+	%
Incorporated Cell Group	2	23	8.695
	10	287	3.484		Incorporated Cell Group	Incorporated Single Cells
	3	129	2.325		5.00244	0
	5	71	7.042	mean	2.17666	0
	10	171	5.847	sd
	4	65	6.153
	5	210	2.381
	6	112	5.357
	4	107	3.738
Incorporated Single Cells	0	2	0
	0	0	0
	0	0	0
	0	6	0
	0	6	0
	0	7	0
	0	1	0
	0	10	0
	0	6	0
											ICG: Incorporated Cell Group
											ISC: Incorporated Single Cells

## Sheet: In vitro SOX2 2DPO-5DPO
ChiPS4-pmGFP		2DPO-D08				5DPO-D11
		SOX2				SOX2
	SOX2+	Total	%		SOX2+	Total	%
	90	99	90.9		147	174	84.482
	88	102	86.27		115	150	76.666
	98	115	85.217		147	169	86.982
	118	130	90.769		213	233	91.416
	58	95	61.052		105	155	67.741		n=3 independent differentiations
	87	99	87.878		140	171	81.871		N=15 neural rosettes (5 rosettes per differentiation)
	83	101	82.178		141	151	93.377		Error bars= SEM
	101	119	84.873		89	111	80.18		Statistical analysis was performed using non-parametric Mann-Whitney U test for none normally distributed data using Prism V8
	120	129	93.023		198	215	92.093
	115	122	94.262		131	164	79.878
	80	95	84.21		171	208	82.211
	99	110	90		172	205	83.902
	82	103	79.611		190	230	82.608
	78	101	77.227		165	204	80.882
	115	132	87.121		196	212	92.452
		2DPO-D08	5DPO-D11
	mean	84.9727	83.7827
	sd	8.14707	6.85254
	SEM	2.10356	1.76932
											P-value = 0.4076

## Sheet: in vitro PAX7 2DPO-5DPO
ChiPS4-pmGFP		2DPO-D08				5DPO-D11
		PAX7				PAX7
	PAX7+	Total	%		PAX7+	Total	%
	60	103	58.252		122	151	80.794
	55	120	45.833		200	270	74.074
	42	98	42.857		157	201	78.109
	65	128	50.781		120	168	71.428
	66	100	66		104	160	65
	52	90	57.777		170	220	77.272
	71	138	51.449		134	180	74.444
	67	116	57.758		126	181	69.613
	60	100	60		125	171	73.099
	69	90	76.666		146	200	73
	65	100	65		174	250	69.6
	72	95	75.789		203	300	67.666
	70	115	60.869		181	248	72.983
	76	100	76		101	158	63.924
	73	118	61.864		126	228	55.263
		2DPO-D08	5DPO-D11
	mean	60.4597	71.0846
	sd	10.3883	6.37094
	SEM	2.68224	1.64497
											P-value = 0.0059

## Sheet: in vitro P27 2DPO-5DPO
ChiPS4-pmGFP		2DPO-D08				5DPO-D11
		P27				P27
	P27+	Total	%		P27+	Total	%
	10	121	8.264		30	145	20.689
	10	104	9.615		25	146	17.123
	8	94	8.51		30	245	12.244
	11	94	11.702		23	170	13.529
	9	96	9.375		22	125	17.6
	12	108	11.111		29	170	17.058
	15	123	12.195		26	150	17.333
	11	104	10.576		28	149	18.791
	7	114	6.14		24	140	17.142
	6	95	6.315		24	153	15.686
	12	115	10.434		35	145	24.137
	10	103	9.708		29	138	21.014
	13	112	11.607		33	121	27.272
	10	96	10.416		51	145	35.172
	11	98	11.224		31	126	24.603
		2DPO-D08	5DPO-D11
	mean	9.8128	19.9595
	sd	1.84263	5.87323
	SEM	0.475765	1.51646
											P-value = <0.0001

## Sheet: in vitro ISLET1 2DPO-5DPO
ChiPS4-pmGFP		2DPO-D08				5DPO-D11
		ISLET1				ISLET1
	ISLET1	Total	%		ISLET1+	Total	%
	0	162	0		5	65	7.692
	0	175	0		7	80	8.75
	0	166	0		5	68	7.352
	0	59	0		15	100	15
	0	60	0		9	81	11.111
	0	59	0		3	55	5.455
	0	89	0		7	55	12.727
	0	98	0		4	50	8
	0	88	0		10	100	10
	0	125	0		23	153	15.032
	0	120	0		25	155	16.129
	0	119	0		13	156	8.333
	0	132	0		15	132	11.363
	0	140	0		7	134	5.223
	0	127	0		7	140	5
		2DPO-D08	5DPO-D11
	mean	0	9.81113
	sd	0	3.6551
	SEM	0	0.943742
											P-value = <0.0001

## Sheet: Xenograft SOX2 2DPO-5DPO
Xenograft		2DPO				5DPO
		SOX2				SOX2
	SOX2+	Total GFP+	%		SOX2+ cells	Total GFP+	%
	22	22	100		107	107	100
	28	28	100		28	28	100
	18	20	90		139	139	100
	16	19	84.21		97	103	94.174		n=3 different transplanted chicken embryos
	25	26	96.153		90	103	87.378		3 different sections per markers
	22	24	91.666		87	87	100		Error bars= SD
	5	5	100		98	111	88.288		Statistical analysis was performed using non-parametric Mann-Whitney U test for none normally distributed data using Prism V8
	3	3	100		56	58	96.551
	16	16	100		107	111	96.396
	13	14	92.857
	156	171	91.228
	145	155	93.548
		2DPO	5DPO
	mean	94.9718	95.8652
	sd	5.22049	5.01803
	SEM	1.50702	1.67268
											P-value = 0.6894

## Sheet: Xenograft PAX7 2DPO-5DPO
Xenograft		2DPO				5DPO
		PAX7				PAX7
	PAX7+	Total GFP+	%		PAX7+ cells	Total GFP+	%
	38	40	95		88	96	91.666
	34	35	97.142		184	194	94.845
	10	10	100		92	98	93.877
	8	10	80		10	10	100
	23	25	92		170	238	71.428
	30	32	93.75		119	234	50.854
	110	120	91.666		12	66	18.181
	90	91	98.901		181	195	92.82
	37	37	100		102	125	81.6
	30	32	93.75
	1	1	100
		2DPO	5DPO
	mean	94.7463	77.2523
	sd	5.85097	26.9086
	SEM	1.76413	8.96952
										P-value = 0.6918

[truncated: 2 more sheets: Xenograft P27 2DPO-5DPO, Xenograft ISLET1 2DPO-5DPO]
