# Supplementary material for: Human spinal cord in vitro differentiation pace is initially maintained in heterologous embryonic environments
Source: eLife. 2022 Feb 21;11:e67283. doi: 10.7554/eLife.67283 (PMC8929931; doi:10.7554/eLife.67283)
Supplement: Figure 6—source data 2. [file elife-67283-fig6-data2.xlsx]

## Sheet: 5DPO Ki67
		Ki67
	Ki67+cells	Total GFP+	%
incorporated Cell Group	110	130	84.6
	10	10	100		mean	86.8233
	130	160	81.25		sd	8.04156
	130	160	81.25		SEM	2.68052
	60	70	85.71
	15	15	100
	70	90	77.77
	95	115	82.6
	75	85	88.23
Incorporated Single Cells	8	10	80
	10	10	100		mean	68.4062
	7	10	70		sd	18.8325
	5	7	71.42		SEM	6.65829
	6	10	60
	7	10	70
	2	6	33.33					ICG: Incorporated Cell Group
	5	8	62.5					ISC: Incorporated Single Cells

## Sheet: 5DPO Cas3
5DPO		Cas3
	Cas3+cells	Total GFP+	%
incorporated Cell Group	2	125	1.6
	0	115	0		mean	1.37182
	2	50	4		sd	1.62816
	2	50	4		SEM	0.490908
	2	60	3.33
	0	203	0
	0	80	0
	1	130	0.76
	1	150	0.66
	0	120	0
	1	135	0.74
Incorporated Single Cells	0	5	0
	0	4	0		mean	2.829
	2	15	13.3		sd	4.83738
	1	12	8.33		SEM	1.52971
	1	15	6.66					ICG: Incorporated Cell Group
	0	6	0					ISC: Incorporated Single Cells
	0	10	0
	0	10	0
	0	16	0
	0	5	0
