# Supplementary material for: Human spinal cord in vitro differentiation pace is initially maintained in heterologous embryonic environments
Source: eLife. 2022 Feb 21;11:e67283. doi: 10.7554/eLife.67283 (PMC8929931; doi:10.7554/eLife.67283)
Supplement: Figure 7—source data 1. [file elife-67283-fig7-data1.xlsx]

## Sheet: 5DPO SNAI2
		SNAI2
	SNAI2+ cells	Total GFP+	%
Incorporated Cell Group	0	150	0
	0	185	0
	0	16	0
	0	144	0	mean	0
	0	49	0	sd	0
	0	22	0
	0	12	0
	0	126	0
	0	29	0
	0	81	0
	0	46	0
Incorporated Single Cells	0	3	0
	0	7	0
	0	6	0
	0	12	0	mean	0
	0	3	0	sd	0
	0	9	0
	0	6	0
	0	14	0
	0	3	0
	0	7	0
	0	0	0
	n=3 different transplanted chicken embryos
	3 different sections per markers

## Sheet: 5DPO HNK1
		HNK1
	HNK1+ cells	Total GFP+	%
Incorporated Cell Group	0	157	0
	0	190	0
	0	56	0
	0	134	0	mean	0
	0	69	0	sd	0
	0	36	0
	0	25	0
	0	116	0
	0	59	0
	0	51	0
	0	63	0
Incorporated Single Cells	0	3	0
	0	6	0
	0	5	0
	0	8	0	mean	0
	0	4	0	sd	0
	0	7	0
	0	9	0
	0	10	0
	0	1	0
	0	4	0
	0	0	0

## Sheet: 5DPO TFAP2a
		TFAP2a
	TFAP2a+ cells	Total GFP+	%
Incorporated Cell Group	0	165	0
	0	180	0
	0	85	0
	0	154	0	mean	0
	0	80	0	sd	0
	0	51	0
	0	75	0
	0	135	0
	0	80	0
	0	75	0
	0	95	0
Incorporated Single Cells	0	15	0
	0	4	0
	0	6	0
	0	4	0	mean	0
	0	3	0	sd	0
	0	4	0
	0	3	0
	0	5	0
	0	6	0
	0	12	0
	0	4	0
