# Supplementary material for: Human spinal cord in vitro differentiation pace is initially maintained in heterologous embryonic environments
Source: eLife. 2022 Feb 21;11:e67283. doi: 10.7554/eLife.67283 (PMC8929931; doi:10.7554/eLife.67283)
Supplement: Figure 8—source data 1. [file elife-67283-fig8-data1.xlsx]

## Sheet: Heterochrony 2DPO PAX7
			PAX7
		PAX7+	Total GFP+	%
	incorporated Cell Group	84	94	89.36
		85	90	94.4	mean	94.576
		79	83	95.18	sd	3.27602
		130	136	95.58
		120	122	98.36
		36	40	90
	Incorporated Single Cells	5	7	71.42								ICG: Incorporated Cell Group
		3	3	100								ISC: Incorporated Single Cells
		2	2	100	mean	93.332
		1	1	100	sd	14.9101
		2	2	100
		4	6	66.66
	n=3 different transplanted chicken embryos
	3 different sections per markers
	Error bars= SD
	Statistical analysis was performed using non-parametric Mann-Whitney U test for none normally distributed data using Prism V8

## Sheet: Heterochrony 2DPO P27
			P27
		P27+	Total GFP+	%
	incorporated Cell Group	3	185	1.62
		0	196	0	mean	0.27
		0	50	0	sd	0.661362
		0	88	0
		0	85	0
		0	80	0
											ICG: Incorporated Cell Group
	Incorporated Single Cells	1	4	25							ISC: Incorporated Single Cells
		1	3	33.33
		0	1	0	mean	9.72167
		0	2	0	sd	15.2894
		0	1	0
		0	1	0

## Sheet: Heterochrony 2DPO ISLET1
			ISLET1
		ISLET1+	Total GFP+	%
	incorporated Cell Group	0	166	0
		0	197	0	mean	0
		0	48	0	sd	0
		0	90	0
		0	50	0
		0	100	0
	Incorporated Single Cells	0	1	0							ICG: Incorporated Cell Group
		0	3	0							ISC: Incorporated Single Cells
		0	2	0	mean	0
		0	5	0	sd	0
		0	1	0
		0	2	0

## Sheet: Heterochrony 2DPO NFIA
			NFIA
		NFIA+	Total GFP+	%
	incorporated Cell Group	0	143	0
		0	50	0	mean	0
		0	164	0	sd	0
		0	95	0
		0	90	0
		0	150	0
	Incorporated Single Cells	0	2	0							ICG: Incorporated Cell Group
		0	1	0							ISC: Incorporated Single Cells
		0	1	0	mean	0
		0	2	0	sd	0
		0	2	0
		0	3	0
