# Supplementary material for: Human spinal cord in vitro differentiation pace is initially maintained in heterologous embryonic environments
Source: eLife. 2022 Feb 21;11:e67283. doi: 10.7554/eLife.67283 (PMC8929931; doi:10.7554/eLife.67283)
Supplement: Figure 9—source data 1. [file elife-67283-fig9-data1.xlsx]

## Sheet: Heterochrony 5DPO PAX7
			PAX7
		PAX7+	Total GFP+	%
	incorporated Cell Group	60	77	77.9
		190	250	76	mean	68.97
		165	265	62.26	sd	8.78663
		75	145	51.72
		45	61	73.77
		65	100	65
		32	45	71.11
		37	50	74
	Incorporated Single Cells	1	5	20
		7	15	46.66							ICG: Incorporated Cell Group
		5	16	31.25	mean	25.3637					ISC: Incorporated Single Cells
		3	15	20	sd	9.50308
		1	5	20
		5	20	25							P-value = 0.002
		3	15	20
		3	15	20
	n=3 different transplanted chicken embryos
	3 different sections per markers
	Error bars= SD
	Statistical analysis was performed using non-parametric Mann-Whitney U test for none normally distributed data using Prism V8

## Sheet: Heterochrony 5DPO P27
			P27
		P27+	Total GFP+	%
	incorporated Cell Group	30	200	15
		70	220	31.81	mean	31.0437
		65	220	29.54	sd	9.78171
		22	50	44
		3	10	30
		25	100	25
		9	20	45
		7	25	28
	Incorporated Single Cells	9	10	90
		14	15	93.33							ICG: Incorporated Cell Group
		5	6	83.33	mean	78.27					ISC: Incorporated Single Cells
		3	4	75	sd	9.562
		2	3	66.66
		9	12	75							P-value = 0.0002
		5	7	71.42
		5	7	71.42

## Sheet: Heterochrony 5DPO ISLET1
			ISLET1
		ISLET1+	Total GFP+	%
	incorporated Cell Group	10	25	40
		10	95	10.52	mean	22.935
		90	265	33.96	sd	12.83
		35	215	16.27
		10	100	10
		10	26	38.46
		16	70	22.85
		8	70	11.42
	Incorporated Single Cells	4	5	80
		2	3	66.66
		5	7	71.42	mean	62.2587					ICG: Incorporated Cell Group
		10	25	40	sd	23.7739					ISC: Incorporated Single Cells
		2	15	13.33
		2	3	66.66
		8	10	80							P-value = 0.0031
		8	10	80
